# Supplementary material
Source: Research Square preprint supplement (doi:10.21203/rs.3.rs-9497546/v1)
Supplement: Supplementary file 1 [file 2716db98aed306a765e2dcd5.xlsx]

## Sheet: Sheet1
State	Wheel label	Uint (mJ)	ΔEp (mJ)	ΔEp / Uec	ΔEP - Uint(mJ)	Uec（mJ）	Gc (J/m^2)	θ(°)	m (g)	N	2*R (mm)	l*h (mm^2)	E (MPa)	v (mm/s)	h (mm)	l (mm)	β(°)	C
Detachment and unstable	Wheel 1	0.320829	1.36029	14.6268	1.03946	0.093	6.41657	150	35.8	12	29.62	50	0.314353	8.14	10	5	45	0.5734
		0.320829	0.448365	4.82113	0.127536	0.093	6.41657	150	11.8	12	29.62	50	0.314353	0	10	5	45	0.5734
		0.320829	0.246981	2.6557	-0.0738482	0.093	6.41657	150	6.5	12	29.62	50	0.314353	0	10	5	45	0.5734
		0.320829	0.737142	7.92626	0.416313	0.093	6.41657	150	19.4	12	29.62	50	0.314353	2.19	10	5	45	0.5734
		0.320829	0.634083	7.20549	0.313255	0.088	6.41657	135	11.8	12	29.62	50	0.314353	0.46	10	5	45	0.5734
		0.320829	0.171955	1.95403	-0.148874	0.088	6.41657	135	3.2	12	29.62	50	0.314353	0	10	5	45	0.5734
	Wheel 2	0.184529	0.246981	3.29307	0.062452	0.075	3.69057	150	6.5	12	29.62	50	0.264432	0	10	5	45	0.4556
		0.184529	0.448365	5.9782	0.263836	0.075	3.69057	150	11.8	12	29.62	50	0.264432	0	10	5	45	0.4556
		0.184529	0.737142	9.82856	0.552613	0.075	3.69057	150	19.4	12	29.62	50	0.264432	0	10	5	45	0.4556
		0.184529	1.36029	18.1372	1.17576	0.075	3.69057	150	35.8	12	29.62	50	0.264432	0	10	5	45	0.4556
		0.184529	0.171955	0.217664	-0.0125737	0.79	3.69057	135	3.2	12	29.62	50	0.264432	0	10	5	45	0.4556
		0.184529	0.210601	2.26452	0.0260723	0.093	3.69057	120	3.2	12	29.62	50	0.264432	0	10	5	45	0.4556
		0.184529	0.634083	0.802637	0.449555	0.79	3.69057	135	11.8	12	29.62	50	0.264432	2.92	10	5	45	0.4556
		0.184529	0.349283	0.442131	0.164755	0.79	3.69057	135	6.5	12	29.62	50	0.264432	0.49	10	5	45	0.4556
	Wheel 3	0.306014	0.12159	2.43181	-0.184423	0.05	6.12027	150	3.2	12	29.62	50	0.186573	0	10	5	45	0.7432
		0.306014	0.246981	4.93961	-0.0590331	0.05	6.12027	150	6.5	12	29.62	50	0.186573	0	10	5	45	0.7432
		0.306014	0.448365	8.96729	0.142351	0.05	6.12027	150	11.8	12	29.62	50	0.186573	0	10	5	45	0.7432
		0.306014	0.737142	14.7428	0.431128	0.05	6.12027	150	19.4	12	29.62	50	0.186573	0	10	5	45	0.7432
		0.306014	1.36029	27.2059	1.05428	0.05	6.12027	150	35.8	12	29.62	50	0.186573	0	10	5	45	0.7432
		0.306014	0.349283	4.10921	0.0432696	0.085	6.12027	135	6.5	12	29.62	50	0.186573	0	10	5	45	0.7432
	Wheel 4	0.287614	0.12159	1.78809	-0.166024	0.068	5.75228	150	3.2	12	29.62	50	0.225558	0	10	5	45	0.4769
		0.287614	0.246981	3.63207	-0.0406337	0.068	5.75228	150	6.5	12	29.62	50	0.225558	0	10	5	45	0.4769
		0.287614	0.448365	6.5936	0.16075	0.068	5.75228	150	11.8	12	29.62	50	0.225558	0	10	5	45	0.4769
		0.287614	0.737142	10.8403	0.449528	0.068	5.75228	150	19.4	12	29.62	50	0.225558	2.97	10	5	45	0.4769
		0.287614	0.171955	1.81005	-0.115659	0.095	5.75228	135	3.2	12	29.62	50	0.225558	0	10	5	45	0.4769
		0.287614	0.349283	3.67667	0.061669	0.095	5.75228	135	6.5	12	29.62	50	0.225558	0	10	5	45	0.4769
		0.287614	0.634083	6.67456	0.346469	0.095	5.75228	135	11.8	12	29.62	50	0.225558	0	10	5	45	0.4769
	Wheel 5	0.283955	0.234895	2.44682	-0.0490605	0.096	5.6791	105	3.2	12	29.62	50	0.301904	0	10	5	45	0.5562
		0.283955	0.634083	6.53694	0.350128	0.097	5.6791	135	11.8	12	29.62	50	0.301904	0.48	10	5	45	0.5562
		0.283955	0.737142	8.57142	0.453187	0.086	5.6791	150	19.4	12	29.62	50	0.301904	2.15	10	5	45	0.5562
		0.283955	0.737142	8.57142	0.453187	0.086	5.6791	150	19.4	12	29.62	50	0.301904	1.38	10	5	45	0.5562
		0.283955	0.448365	5.21354	0.164409	0.086	5.6791	150	11.8	12	29.62	50	0.301904	0	10	5	45	0.5562
		0.283955	0.246981	2.87187	-0.0369746	0.086	5.6791	150	6.5	12	29.62	50	0.301904	0	10	5	45	0.5562
Rolling and stationary	Wheel 1	0.320829	0.349283	3.96913	0.0284545	0.088	6.41657	135	6.5	12	29.62	50	0.314353	0	10	5	45	0.5734
		0.320829	1.92374	21.8607	1.60292	0.088	6.41657	135	35.8	12	29.62	50	0.314353	7.01	10	5	45	0.5734
		0.320829	1.04248	11.8463	0.721647	0.088	6.41657	135	19.4	12	29.62	50	0.314353	1.57	10	5	45	0.5734
		0.320829	0.210601	2.02501	-0.110228	0.104	6.41657	120	3.2	12	29.62	50	0.314353	0	10	5	45	0.5734
		0.320829	0.427783	4.1133	0.106954	0.104	6.41657	120	6.5	12	29.62	50	0.314353	0.17	10	5	45	0.5734
		0.320829	0.77659	7.46722	0.455762	0.104	6.41657	120	11.8	12	29.62	50	0.314353	0.83	10	5	45	0.5734
		0.320829	1.27677	12.2766	0.955939	0.104	6.41657	120	19.4	12	29.62	50	0.314353	3.06	10	5	45	0.5734
		0.320829	2.3561	22.6548	2.03527	0.104	6.41657	120	35.8	12	29.62	50	0.314353	13.03	10	5	45	0.5734
	Wheel 2	0.184529	1.92374	2.43512	1.73922	0.79	3.69057	135	35.8	12	29.62	50	0.264432	15.77	10	5	45	0.4556
		0.184529	0.234895	2.66926	0.0503661	0.088	3.69057	105	3.2	12	29.62	50	0.264432	0	10	5	45	0.4556
		0.184529	0.427783	4.59982	0.243254	0.093	3.69057	120	6.5	12	29.62	50	0.264432	0.43	10	5	45	0.4556
		0.184529	0.77659	8.35043	0.592062	0.093	3.69057	120	11.8	12	29.62	50	0.264432	2.16	10	5	45	0.4556
		0.184529	1.30309	14.0117	1.11856	0.093	3.69057	120	19.8	12	29.62	50	0.264432	5.3	10	5	45	0.4556
		0.184529	2.3561	25.3344	2.17157	0.093	3.69057	120	35.8	12	29.62	50	0.264432	21.26	10	5	45	0.4556
		0.184529	0.47713	5.42193	0.292601	0.088	3.69057	105	6.5	12	29.62	50	0.264432	0.54	10	5	45	0.4556
		0.184529	0.866174	9.84289	0.681646	0.088	3.69057	105	11.8	12	29.62	50	0.264432	2.31	10	5	45	0.4556
		0.184529	1.42405	16.1824	1.23952	0.088	3.69057	105	19.4	12	29.62	50	0.264432	4.18	10	5	45	0.4556
		0.184529	2.62788	29.8623	2.44336	0.088	3.69057	105	35.8	12	29.62	50	0.264432	30.26	10	5	45	0.4556
	Wheel 3	0.306014	0.210601	4.89769	-0.0954129	0.043	6.12027	120	3.2	12	29.62	50	0.186573	0	10	5	45	0.7432
		0.306014	0.634083	7.4598	0.32807	0.085	6.12027	135	11.8	12	29.62	50	0.186573	0.46	10	5	45	0.7432
		0.306014	1.04248	12.2644	0.736462	0.085	6.12027	135	19.4	12	29.62	50	0.186573	1.2	10	5	45	0.7432
		0.306014	1.90225	22.3794	1.59624	0.085	6.12027	135	35.4	12	29.62	50	0.186573	5.45	10	5	45	0.7432
		0.306014	0.77659	18.0602	0.470577	0.043	6.12027	120	11.8	12	29.62	50	0.186573	2.35	10	5	45	0.7432
		0.306014	2.3561	54.7929	2.05008	0.043	6.12027	120	35.8	12	29.62	50	0.186573	8.42	10	5	45	0.7432
		0.306014	0.866174	18.8299	0.56016	0.046	6.12027	105	11.8	12	29.62	50	0.186573	0.71	10	5	45	0.7432
		0.306014	2.59852	56.4896	2.29251	0.046	6.12027	105	35.4	12	29.62	50	0.186573	8.34	10	5	45	0.7432
	Wheel 4	0.287614	1.04248	10.9734	0.754862	0.095	5.75228	135	19.4	12	29.62	50	0.225558	1.53	10	5	45	0.4769
		0.287614	1.90225	20.0237	1.61464	0.095	5.75228	135	35.4	12	29.62	50	0.225558	10.21	10	5	45	0.4769
		0.287614	0.210601	2.47766	-0.0770134	0.085	5.75228	120	3.2	12	29.62	50	0.225558	0.5	10	5	45	0.4769
		0.287614	0.427783	5.03274	0.140169	0.085	5.75228	120	6.5	12	29.62	50	0.225558	0.2	10	5	45	0.4769
		0.287614	0.77659	9.13636	0.488976	0.085	5.75228	120	11.8	12	29.62	50	0.225558	0.55	10	5	45	0.4769
		0.287614	2.32977	27.4091	2.04216	0.085	5.75228	120	35.4	12	29.62	50	0.225558	19.28	10	5	45	0.4769
	Wheel 5	0.283955	0.243181	2.61485	-0.0407744	0.093	5.6791	90	3.2	12	29.62	50	0.301904	0	10	5	45	0.5562
		0.283955	0.210601	2.08516	-0.0733544	0.101	5.6791	120	3.2	12	29.62	50	0.301904	0	10	5	45	0.5562
		0.283955	0.171955	1.77273	-0.112	0.097	5.6791	135	3.2	12	29.62	50	0.301904	0.09	10	5	45	0.5562
		0.283955	0.12159	1.41384	-0.162365	0.086	5.6791	150	3.2	12	29.62	50	0.301904	0	10	5	45	0.5562
		0.283955	0.349283	3.60086	0.065328	0.097	5.6791	135	6.5	12	29.62	50	0.301904	0.18	10	5	45	0.5562
		0.283955	1.04248	10.7472	0.758521	0.097	5.6791	135	19.4	12	29.62	50	0.301904	1.74	10	5	45	0.5562
		0.283955	0.427783	4.23547	0.143828	0.101	5.6791	120	6.5	12	29.62	50	0.301904	0.12	10	5	45	0.5562
		0.283955	0.77659	7.68901	0.492635	0.101	5.6791	120	11.8	12	29.62	50	0.301904	0.96	10	5	45	0.5562
		0.283955	1.27677	12.6413	0.992812	0.101	5.6791	120	19.4	12	29.62	50	0.301904	3.45	10	5	45	0.5562
		0.283955	0.47713	4.9701	0.193175	0.096	5.6791	105	6.5	12	29.62	50	0.301904	0.23	10	5	45	0.5562
		0.283955	0.866174	9.02265	0.582219	0.096	5.6791	105	11.8	12	29.62	50	0.301904	1.35	10	5	45	0.5562
		0.283955	1.42405	14.8338	1.14009	0.096	5.6791	105	19.4	12	29.62	50	0.301904	4.2	10	5	45	0.5562
		0.283955	0.866332	9.3154	0.582377	0.093	5.6791	90	11.4	12	29.62	50	0.301904	0.15	10	5	45	0.5562
		0.283955	0.493961	5.31141	0.210006	0.093	5.6791	90	6.5	12	29.62	50	0.301904	0.05	10	5	45	0.5562
	Wheel 6	0.363671	0.171955	2.4565	-0.191717	0.07	7.27343	135	3.2	12	29.62	50	0.281828	0.07	10	5	45	0.3442
		0.363671	0.231064	3.30092	-0.132607	0.07	7.27343	135	4.3	12	29.62	50	0.281828	0.22	10	5	45	0.3442
		0.363671	0.634083	9.05833	0.270412	0.07	7.27343	135	11.8	12	29.62	50	0.281828	0.58	10	5	45	0.3442
		0.363671	1.04248	14.8925	0.678805	0.07	7.27343	135	19.4	12	29.62	50	0.281828	3.52	10	5	45	0.3442
	Wheel 7	0.386527	0.243181	2.06085	-0.143346	0.118	7.73053	90	3.2	12	29.62	50	0.4205	0.21	10	5	45	0.3616
		0.386527	0.493961	4.18611	0.107435	0.118	7.73053	90	6.5	12	29.62	50	0.4205	1.27	10	5	45	0.3616
		0.386527	0.805537	6.82658	0.41901	0.118	7.73053	90	10.6	12	29.62	50	0.4205	2.8	10	5	45	0.3616
		0.386527	1.48188	12.5583	1.09536	0.118	7.73053	90	19.5	12	29.62	50	0.4205	13.49	10	5	45	0.3616
		0.386527	2.02904	17.1953	1.64251	0.118	7.73053	90	26.7	12	29.62	50	0.4205	17.38	10	5	45	0.3616
		0.386527	2.5458	21.5746	2.15927	0.118	7.73053	90	33.5	12	29.62	50	0.4205	41.56	10	5	45	0.3616
	Wheel 8	0.350169	0.243181	2.19082	-0.106988	0.111	7.00339	90	3.2	12	29.62	50	0.3809	0	10	5	45	0.4021
		0.350169	0.493961	4.4501	0.143792	0.111	7.00339	90	6.5	12	29.62	50	0.3809	0	10	5	45	0.4021
		0.350169	0.805537	7.25709	0.455367	0.111	7.00339	90	10.6	12	29.62	50	0.3809	2.19	10	5	45	0.4021
		0.350169	1.48188	13.3503	1.13171	0.111	7.00339	90	19.5	12	29.62	50	0.3809	13.86	10	5	45	0.4021
		0.350169	2.02904	18.2796	1.67887	0.111	7.00339	90	26.7	12	29.62	50	0.3809	15.49	10	5	45	0.4021
		0.350169	2.5458	22.9351	2.19563	0.111	7.00339	90	33.5	12	29.62	50	0.3809	29.34	10	5	45	0.4021
